# Supplementary material
Source: PubMed Central journal article supplement (PMC3664997)
Supplement: neo1506_0649SD1.pdf [file neo1506_0649SD1.pdf]

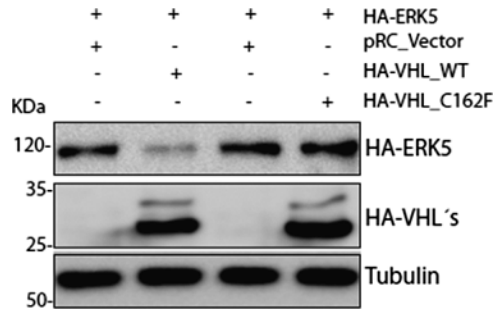

**Figure W1.** Effects of VHL mutant C162F onto HA-ERK5. Cos7 cells were transfected with HA-ERK5 WT alone or in the presence of *prc*/CMV HA-pVHL WT or C162F mutant and processed as in Figure 1B. TCLs (50  $\mu$ g) were blotted against the indicated antibodies.

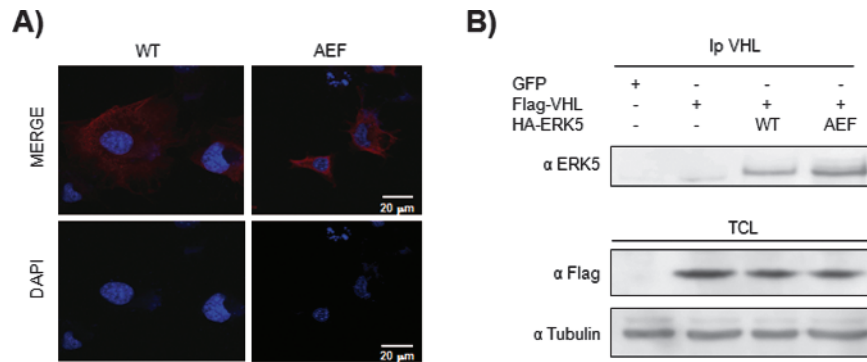

**Figure W2.** Subcellular distribution and binding to pVHL of HA-ERK5-AEF. (A) Cos7 cells were transfected with HA-ERK5-WT or HA-ERK5-AEF and processed as in Figure 2D. (B) 293T cells were transfected (5  $\mu$ g of HA-ERK5-WT or HA-ERK5-AEF plus 5  $\mu$ g of Flag-VHL) and processed as in Figure 2B. TCLs were blotted against Flag or tubulin.

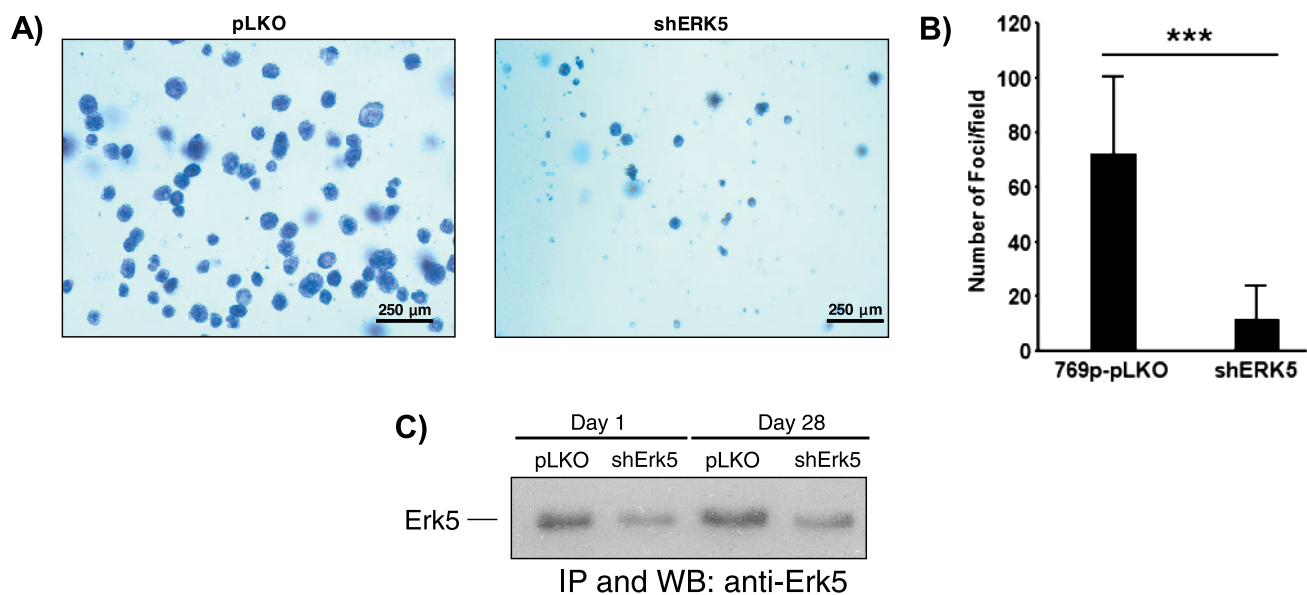

**Figure W3.** (A) Representative fields of 769-P pLKO and shERK5 cells at 28 days. Soft agar assay was performed according to Guerrero et al. [1]. (B) Histogram representing the mean  $\pm$  SD of 12 different fields. Statistical comparison of differences from the means was performed by the Student's *t* test; \*\*\**P* = .004. (C) Western blot analysis of ERK5 in parallel cultures of cells at the indicated time points of the soft agar assay.

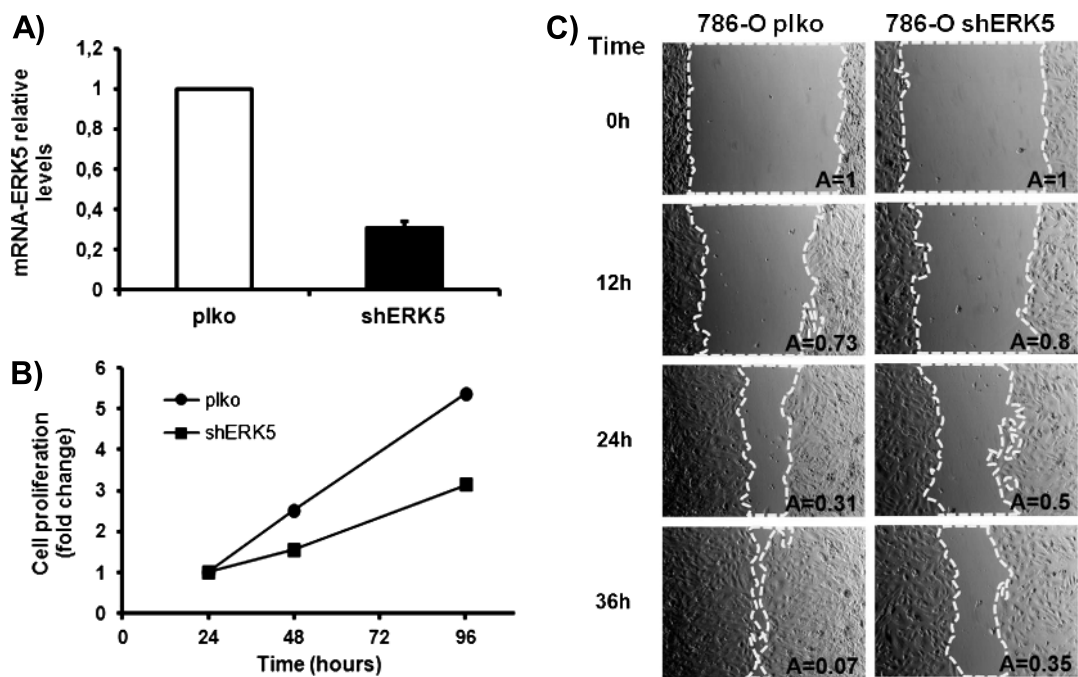

**Figure W4.** (A) 786-O cells were infected with control vector (pLKO) or carrying shRNA against ERK5 (shERK5). Selected pools were evaluated by qRT-PCR. (B) Proliferation assays in 786-O cells. Values of OD at 570 nm at 24 hours were referred as 1. Image shows a representative experiment performed in triplicate cultures of three. (C) Wound healing assays were performed in 786-O cells. Images show a representative experiment of two independent experiments performed in duplicated cultures.

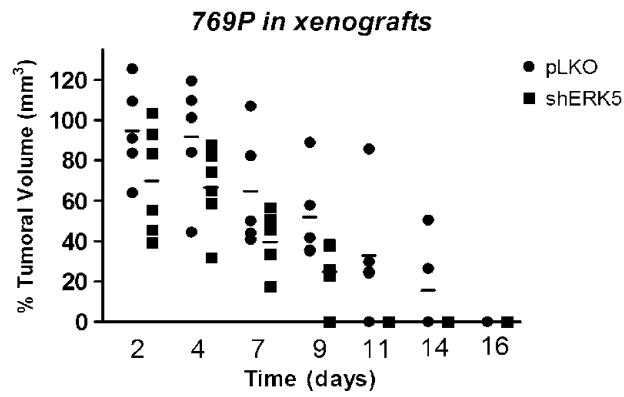

**Figure W5.** Xenograft model using 769-P cells. pLKO ( $n = 5$ ) or shERK5 769-P ( $n = 6$ ) cells were injected subcutaneously ( $6 \times 10^6$  cells) in nude mice (BALB/c), and volumes were evaluated every 2 days until apparent tumor mass regresses. Mice were kept alive until day 45 with no observable tumors.

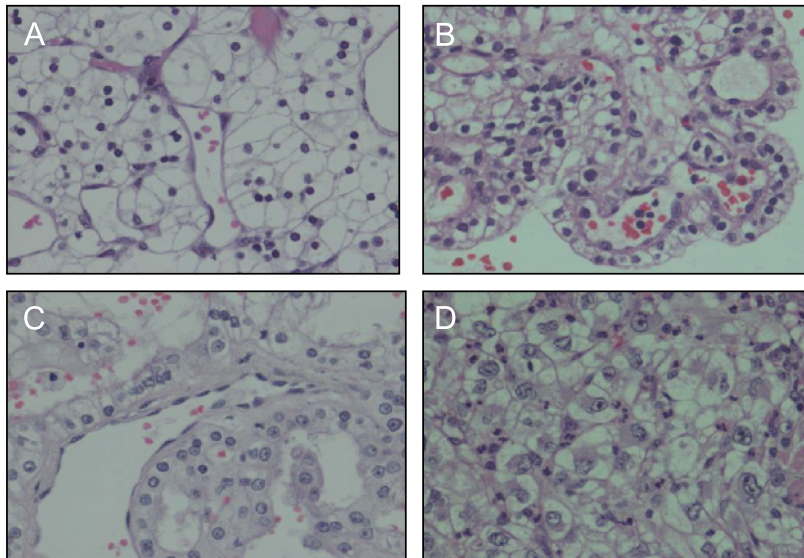

**Figure W6.** Histologic features of diagnosed cases of CCRCC. Four representative images (40 $\times$ ) of different Fuhrman grades observed. (A) Grade I (case 12/09). (B) Grade II (case 08/09). (C) Grade III (case 02/09). (D) Grade IV (case 06/09).

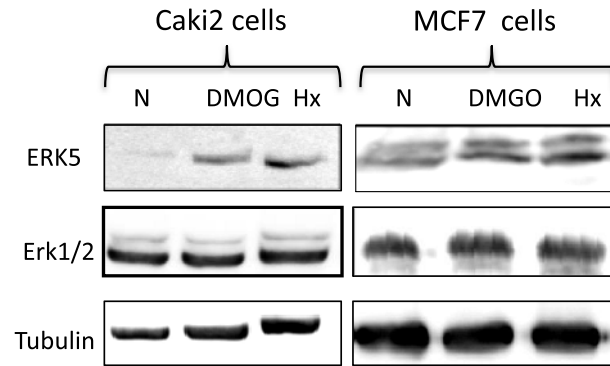

**Figure W7.** Effect of hypoxia onto ERK5 in Caki-2 and MCF7 cells. For hypoxia treatments, cells were grown at 37°C in sealed chambers and flushed with 1% O<sub>2</sub>, 5% CO<sub>2</sub>, 94% N<sub>2</sub> gas mixture for 9 hours. As a positive control, cells were treated with DMOG (1.5 mM) for 9 hours.
